# Supplementary material for: MRE11 and RAD50, but not NBS1, are essential for gene targeting in the moss Physcomitrella patens
Source: PubMed Central journal article supplement — Nucleic Acids Res. 2011 Dec 30;40(8):3496–510. doi: 10.1093/nar/gkr1272 (PMC3333855; doi:10.1093/nar/gkr1272), 2011-12-30
Supplement: supp_gkr1272_nar-02745-v-2011-File008.pdf [file supp_gkr1272_nar-02745-v-2011-File008.pdf]

Supplemental Figure 1

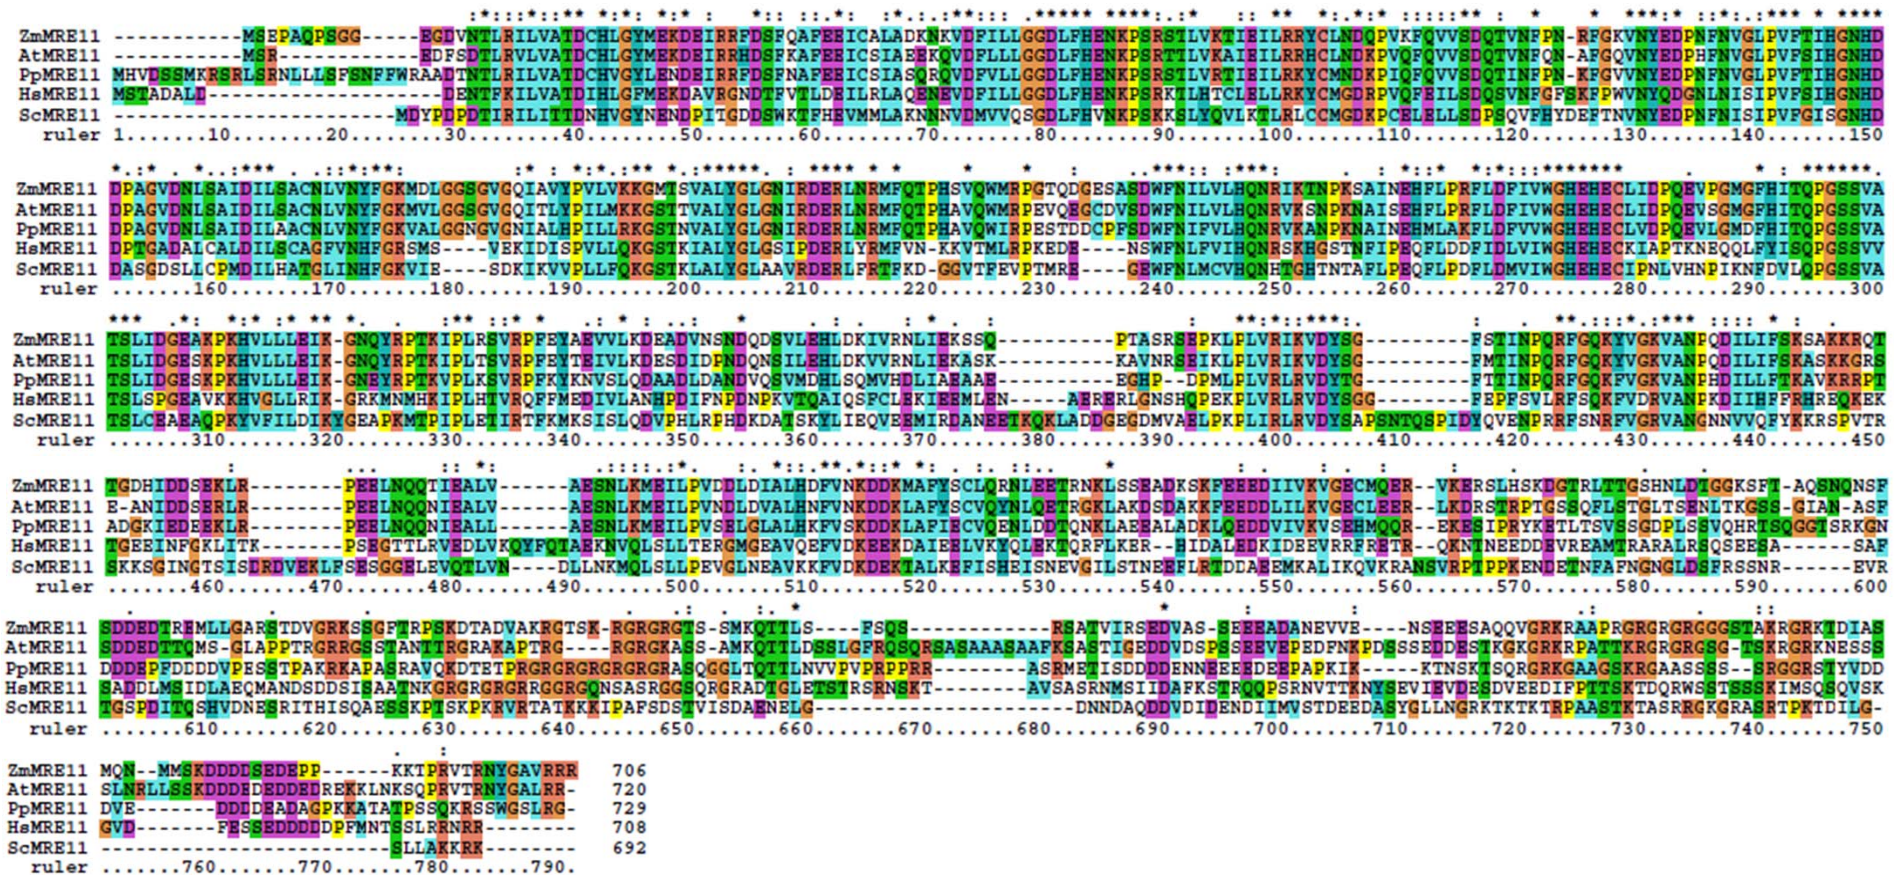

Supplemental figure 1: Sequence alignments of MRN polypeptides.

1a: The deduced polypeptide sequence of PpMRE11 was aligned with the orthologous sequences from maize (ZmMRE11), *Arabidopsis* (AtMRE11), human (HsMRE11) and yeast (ScMRE11).

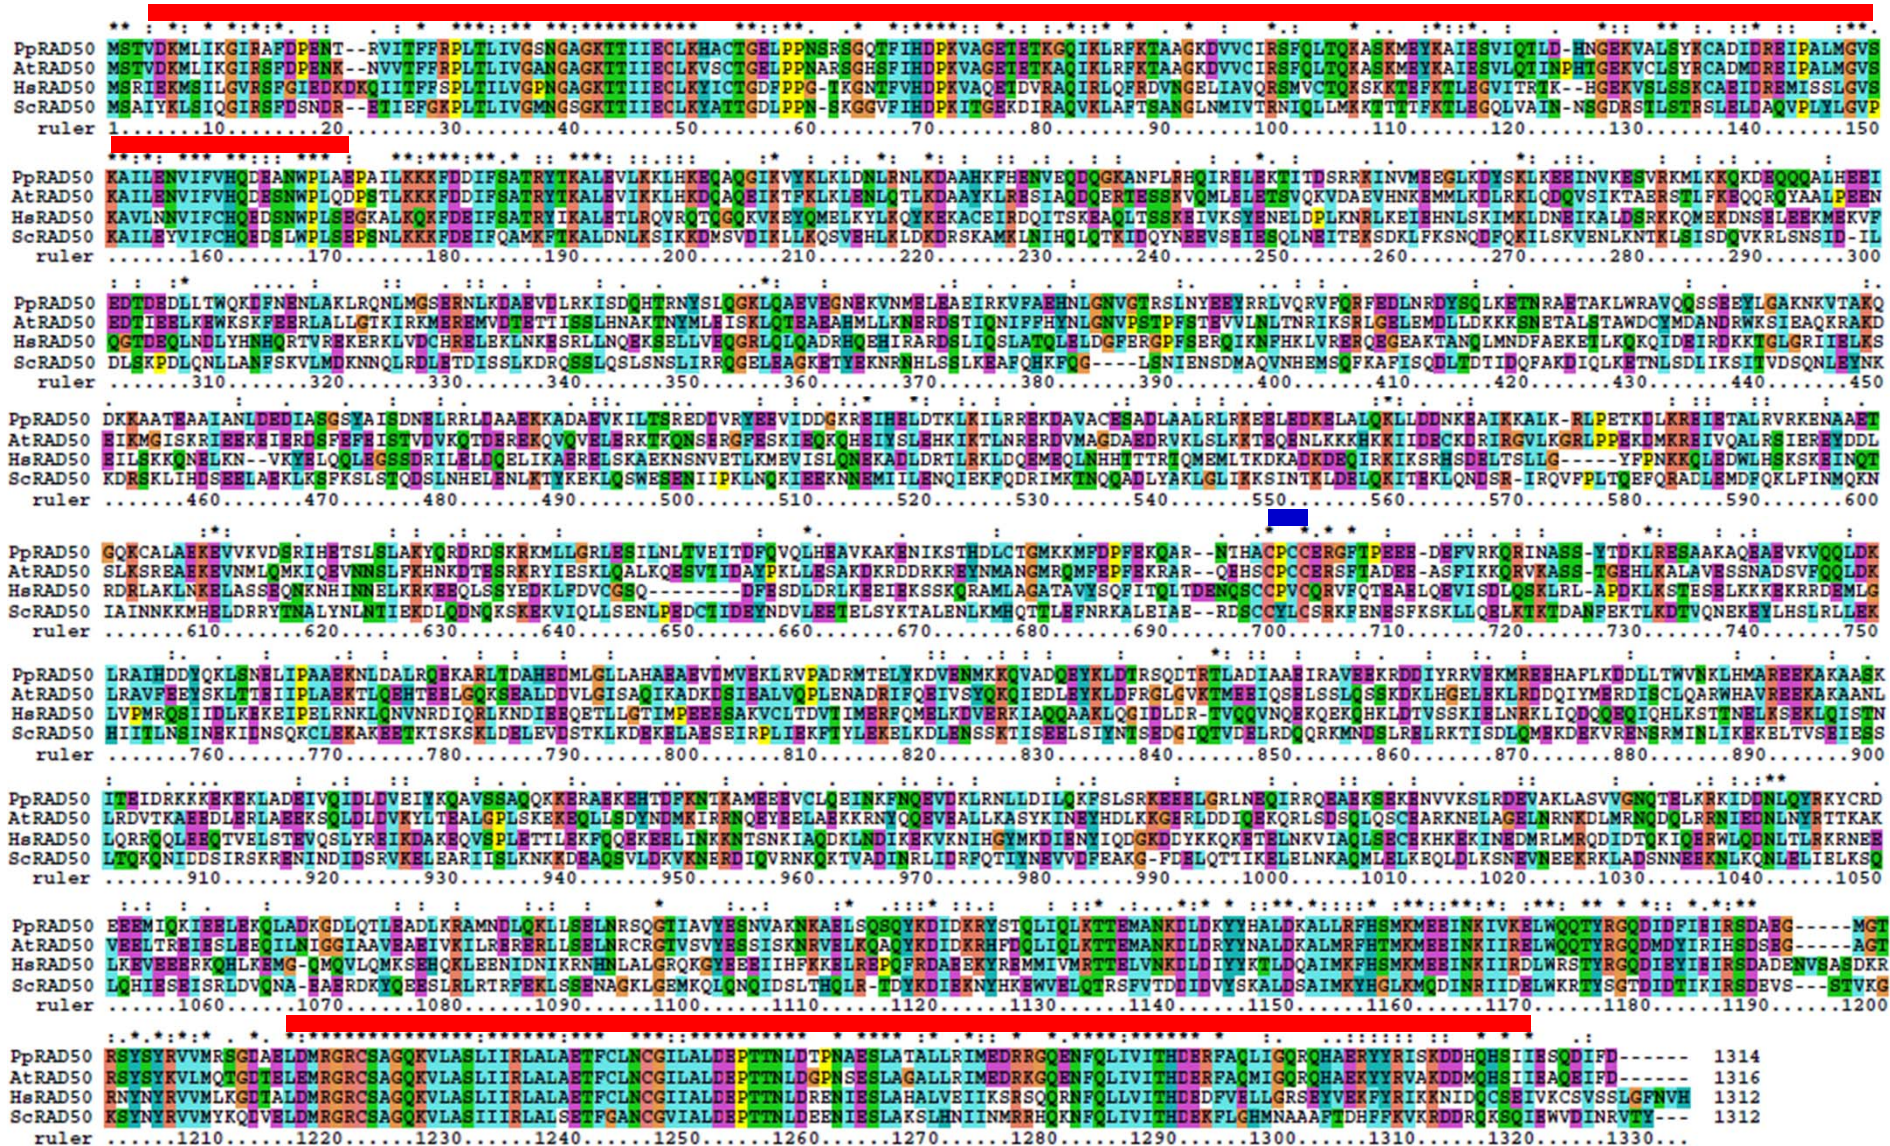

**Supplemental figure 1: Sequence alignments of MRN polypeptides.**

**1b:** The deduced polypeptide sequence of *PpRad50* was aligned with those of *Arabidopsis* (*AtRad50*), *human* (*HsRad50*) and *yeast* (*ScRad50*) polypeptides. The N- and C-terminal Walker A and Walker B domains are overlined in red, and the central CXXC zinc hook motif is overlined in blue.

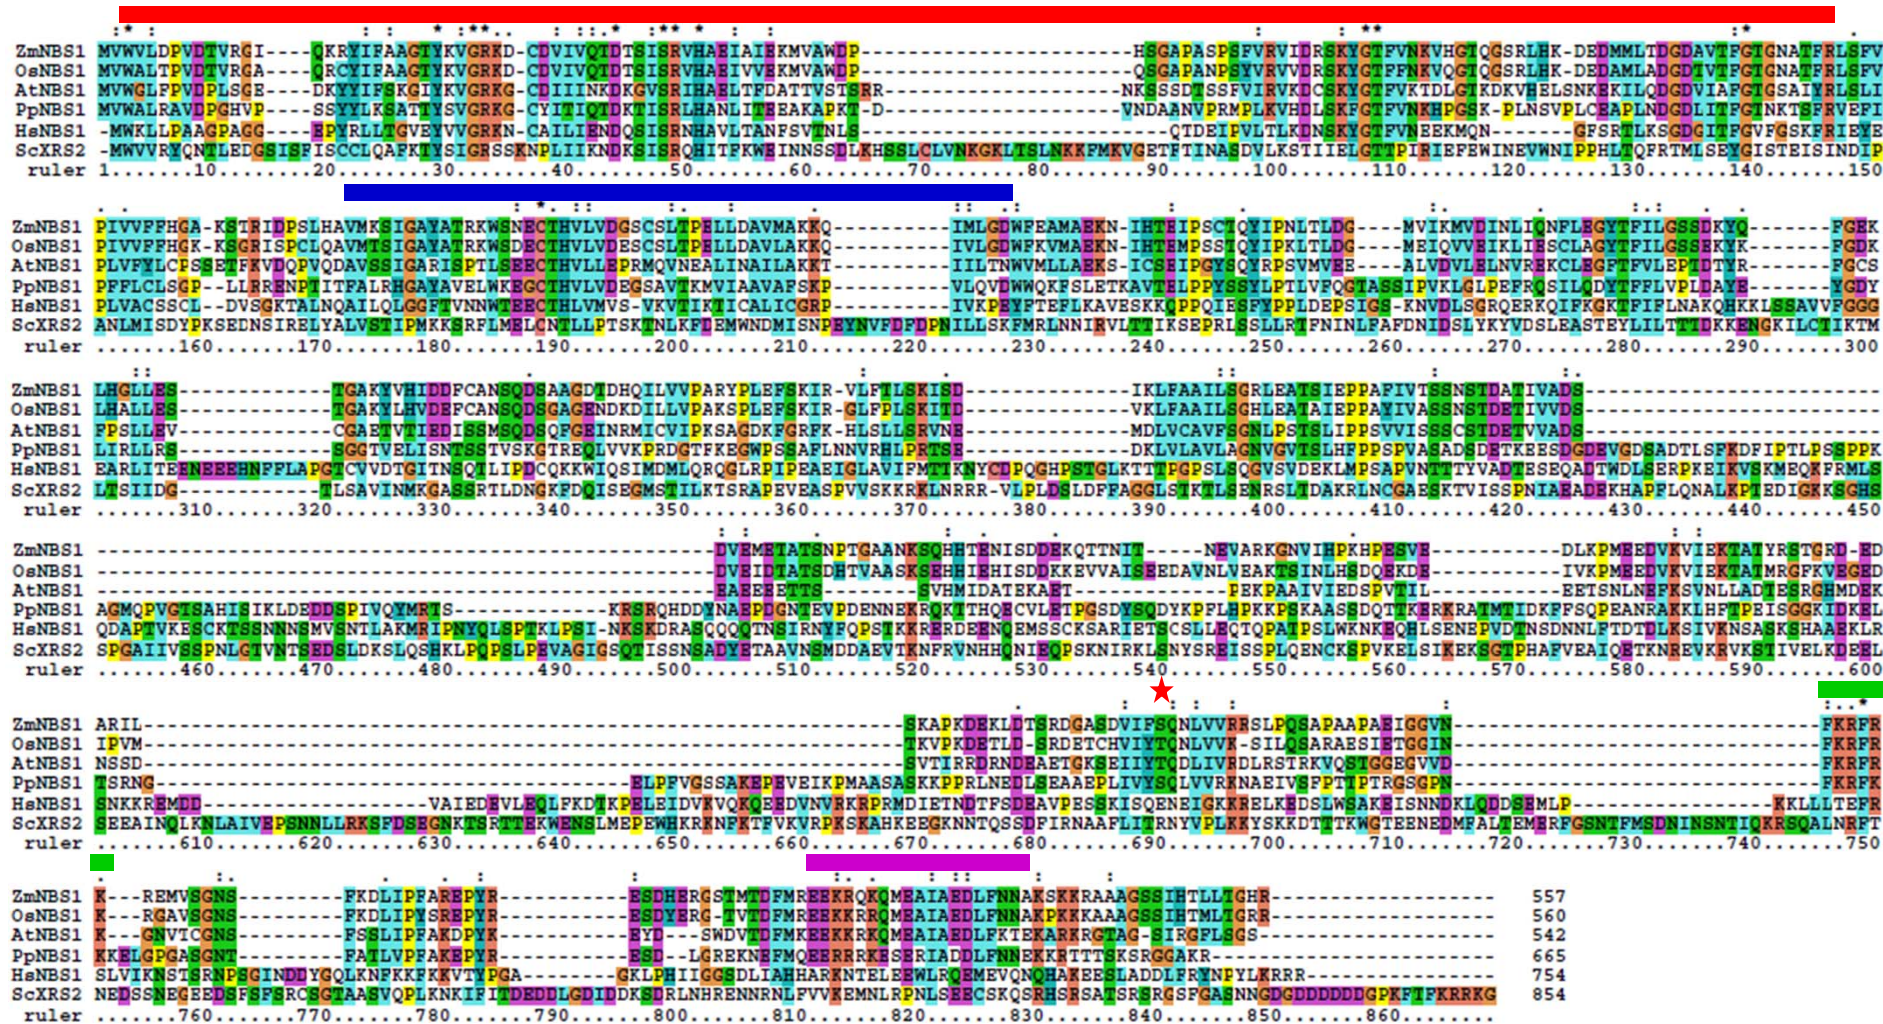

**Supplemental figure 1: Sequence alignments of MRN polypeptides.**

**1c:** The deduced polypeptide sequence of PpNBS1 was aligned with the corresponding sequences from *Arabidopsis* (AtNBS1), human (HsNBS1) and yeast (ScXRS2). The N-terminal fork-head associated domain is overlined in red, and the BRCT domain overlined in blue. The FKRFFK motif overlined in green corresponds to the *Arabidopsis* MRE11-binding motif, whilst the C-terminal domain overlined in purple contains the ATM-interaction domain. An SQ dipeptide conserved in all the plant proteins and is a putative site for phosphorylation by ATM is indicated by a red star.

Supplemental Figure 2

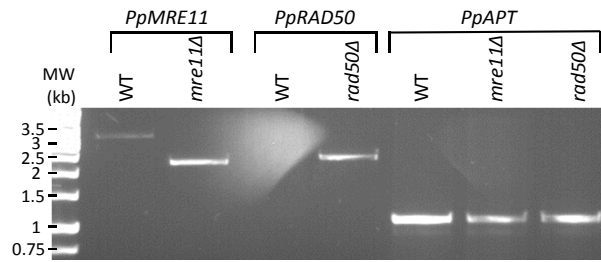

**Supplemental figure 2. Molecular analysis of *mre11Δ* and *rad50Δ* mutants.**

PCR on genomic DNA with primers flanking the deleted region after Cre recombination, PpMRE11#3+PpMRE#4 for *MRE11* and PpRAD50#3+PpRAD50#4 for *RAD50*. Detection of the 10kb WT fragment for PpRAD50 is not possible with these PCR conditions. The *PpAPT* gene has been used as control (primers: APT#16 + APT#19).

Supplemental Figure 3

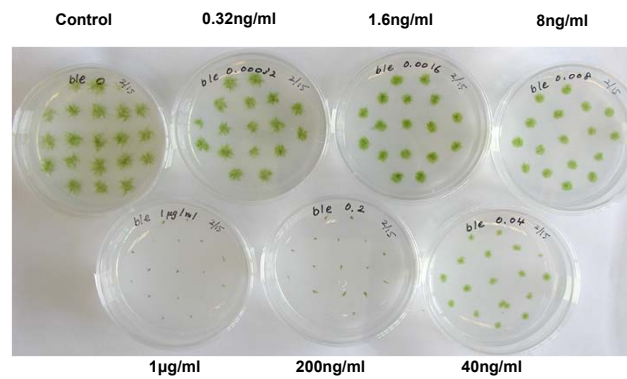

**Supplemental figure 3A: Hypersensitivity of the *rad50* and *mre11* mutants to bleomycin.**

*Physcomitrella* explants were inoculated as “spot inocula” onto BCD-agar plates supplemented with bleomycin at the indicated concentrations, and photographed 10d following inoculation.

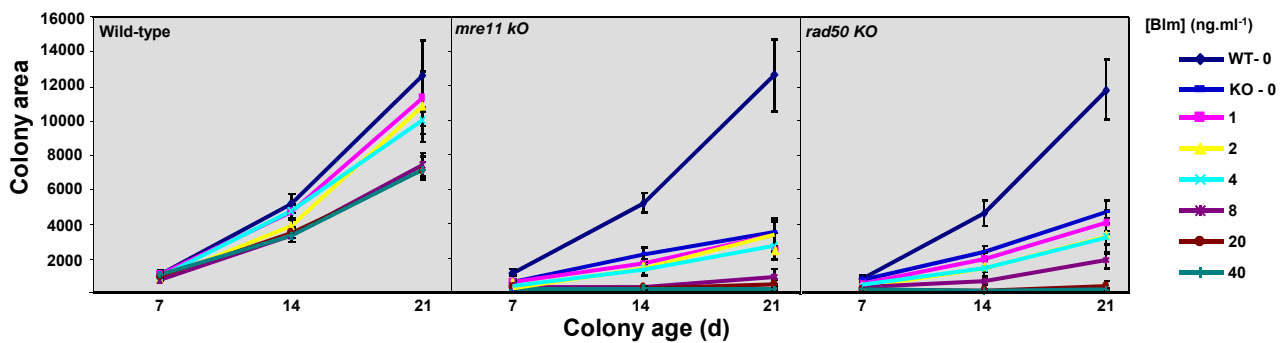

**Supplemental figure 3B: Growth rates of WT, *rad50* and *mre11* mutants chronically exposed to bleomycin.**

Colony growth was measured over a 3-week period following inoculation. The extent of colony growth was estimated following digital photography of the plates. The image analysis software “ImageJ” was used to determine the colony area based on counting the number of pixels corresponding to each colony. Colony area determinations based on different photographs were normalised for each colony using the estimated area of the plate. Note that the growth curve of the wild-type strain in the absence of bleomycin is included in each panel to facilitate comparison between mutant and wild-type.

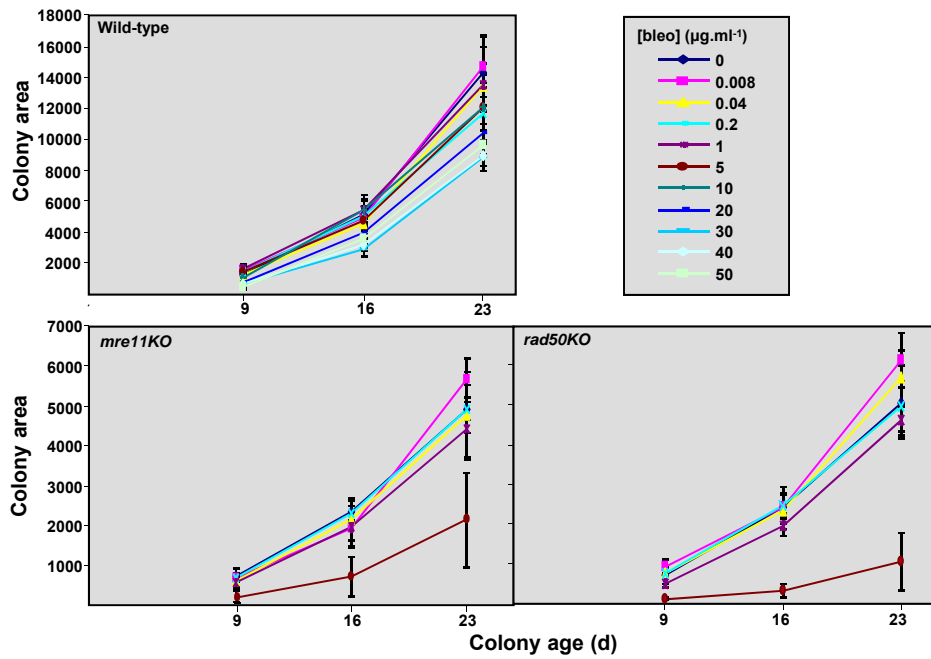

**Supplemental Figure 3C: Recovery of WT, *mre11* and *rad50* strains following acute treatment with bleomycin.**

A protonemal homogenate was incubated in BCDAT liquid medium for 1 hour at the concentrations indicated. After washing, explants were inoculated on drug-free BCDAT-agar and growth rate determined over a 3-week period.

Supplemental Figure 4

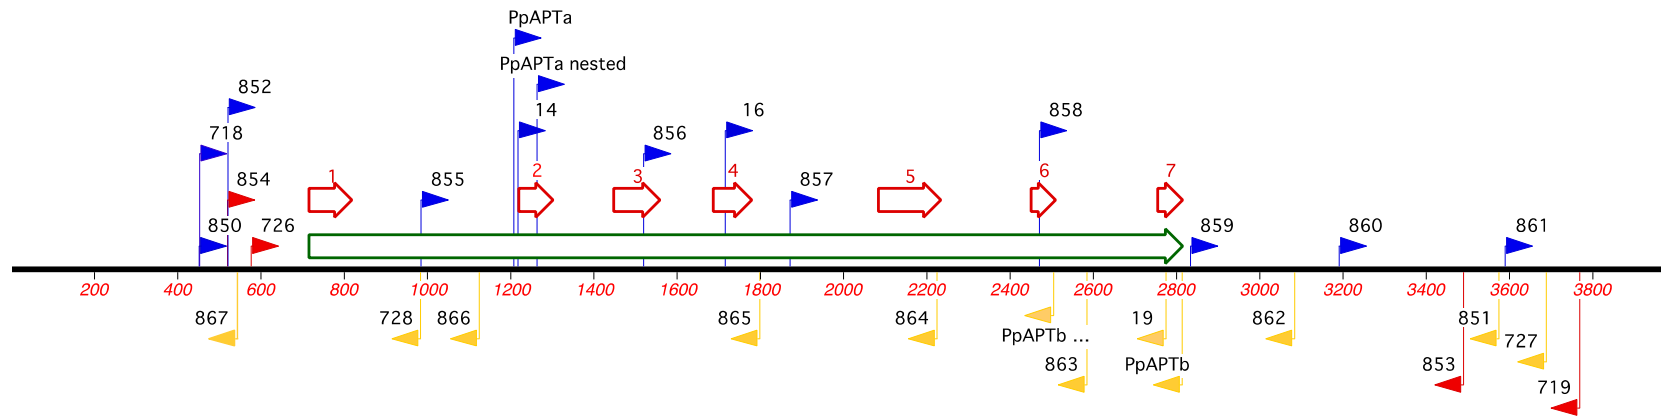

Supplemental figure 4. Map and localization of *APT* primers listed in Supplemental Table 1. Black line represents genomic sequence DQ117987 with indicated nucleotide numbers. Arrows indicate position and orientation of particular sequence: Empty green – transcribed CDS region, empty red - *PpAPT* exons, solid blue - forward and solid yellow reverse sequencing primers, solid red – entire *APT* amplification primers.

Supplemental Table 1.

| Locus | Primer name    | orientation | Sequence 5'-3'           |
|-------|----------------|-------------|--------------------------|
| MRE11 | PpMRE11#1      | Forward     | ACTATGAGGATCCGAATTC      |
|       | PpMRE11#2      | Reverse     | CCGCTGTGGATTGATTGT       |
|       | PpMRE11#3      | Forward     | GCTGGTGTGGTATGTTTGG      |
|       | PpMRE11#4      | Reverse     | CGTAGCTTTTCTCATCTTC      |
| RAD50 | PpRAD50#1      | Forward     | CAGATGCGGAGGTTAAGAT      |
|       | PpRAD50#2      | Reverse     | ACCCGTAGCTTCTCAACCAT     |
|       | PpRAD50#3      | Forward     | ATCGTGGGGTCAAATGGTG      |
|       | PpRAD50#4      | Reverse     | CTTGGCCCCGATAGGTTTG      |
| NBS1  | PpNBS1#1       | Forward     | GGCGAGGAGGGTAGCGTAGGT    |
|       | PpNBS1#2       | Reverse     | CTGTGCGAGGCTCCATTGAACGAT |
| APT   | PpAPT#14       | Forward     | AGATGTGCGCTCCAAGGATG     |
|       | PpAPT#16       | Forward     | CCACCCATTGCTCTTGCCATC    |
|       | PpAPT#19       | Reverse     | CCCGACAATTCTCACGACCC     |
|       | PpAPT#a        | Forward     | CAGGAAGTGAAGATGTCG       |
|       | PpAPT#a nested | Forward     | GGACAGCATCCGTACCATTC     |
|       | PpAPT#718      | Forward     | ATAAACAACGCGAGGATGAC     |
|       | PpAPT#726      | Forward     | ATTCCACTCGCCGAAGGGAC     |
|       | PpAPT#854      | Forward     | TTGGGTAACCGTGAATCAG      |
|       | PpAPT#855      | Forward     | CAGTGCTGTGATGCGGGTTG     |
|       | PpAPT#856      | Forward     | TTGAGCGTTACCGGACCAG      |
|       | PpAPT#857      | Forward     | CAATGTGACCGAGACTTCATCC   |
|       | PpAPT#858      | Forward     | GTGGAATGCGCGTGCTTGTTG    |
|       | PpAPT#859      | Forward     | GTCGCCGTGGTCATTGGTTC     |
|       | PpAPT#860      | Forward     | GCCTCTGATGTTTCTCTTACC    |
|       | PpAPT#861      | Forward     | TCCACAAGGACCCAGTTACC     |
|       | PpAPT#b        | Reverse     | GGTGGAATATGAGGGCGAGTA    |
|       | PpAPT#b nested | Reverse     | CTTGGTTGAGCTGGTAGACC     |
|       | PpAPT#719      | Reverse     | CAATCCACATCCAGCCAATG     |
|       | PpAPT#727      | Reverse     | CCGTCGAATCTGAACCGCGA     |
|       | PpAPT#728      | Reverse     | GAATTTGCTGTGGTTATGGGC    |
|       | PpAPT#851      | Reverse     | GAATATCCTCACGTCGAAAGC    |
|       | PpAPT#853      | Reverse     | GATGAGAAAGGAAGTGC        |
|       | PpAPT#862      | Reverse     | CTTCTAACCTCGGAAACG       |
|       | PpAPT#863      | Reverse     | GAGTTCAATGCCGTCTGGAG     |
|       | PpAPT#864      | Reverse     | CACTCTTGAGCTGCCATCA      |
|       | PpAPT#865      | Reverse     | GGTAAGGGTTGACAGGCACT     |
|       | PpAPT#866      | Reverse     | GGTCAATGTGGCAGCAAGTA     |
|       | PpAPT#867      | Reverse     | GTAACCGTGAATCAGCAAC      |



Supplemental Table 2. Number of selected Wild-type and *Pprad50KO apt* mutants

| genotypes | 1 <sup>st</sup> selection | 2 <sup>nd</sup> selection | 3 <sup>rd</sup> selection |
|-----------|---------------------------|---------------------------|---------------------------|
| RAD50/apt | 77                        | 14                        | 4 (5%)                    |
| rad50/apt | 113                       | 27                        | 11 (10%)                  |

Supplemental Table 3. Spontaneous mutation rate in mutant lines

| Genotype       | Population | 2-FA resistant            | Rate in 10 <sup>6</sup> |
|----------------|------------|---------------------------|-------------------------|
| WT             | 2880000    | 0                         | < 0.3                   |
| <i>mre11</i> Δ | 2500000    | 1 (p= 0.465) <sup>a</sup> | 0.4                     |
| <i>rad50</i> Δ | 2200000    | 0                         | < 0.5                   |
| <i>nbs1</i> KO | 2640000    | 0                         | < 0.4                   |
| <i>msh2</i> Δ  | 2110000    | 78                        | 37                      |

<sup>a</sup> Differences were compared using Fisher's exact test.
